# Supplementary material
Source: HighWire-hosted journal article supplement (http://www.qdcxjkg.com/highwire/filestream/113368/field_highwire_adjunct_files/0/463erratum.pdf)
Supplement: 463erratum.pdf [file 463erratum.pdf]

# Erratum

## "Long-term multicentre trial in chronic nonspecific lung disease: methodology and baseline assessment in adult patients"

P.L.P. Brand, H.A.M. Kerstjens, D.S. Postma, P.J. Sterk, Ph.H. Quanjer, H.J. Sluiter, J.H. Dijkman, C.L.A. van Herwaarden, C. Hilvering, H.M. Jansen, G.H. Koëter, J. Kreukniet, and the Dutch CNSLD study group. – Long-term multicentre trial in chronic nonspecific lung disease: methodology and baseline assessment in adult patients. *Eur Respir J*, 1992, 5: 21–31.

The correct formula page 31 should read:

$$\text{Formula : } n = \frac{2 \times s^2}{(\mu_2 - \mu_1)^2} \times f(\alpha, \beta)$$

$n$  = required number of patients per treatment group

$\mu$  = mean treatment response per group

$\mu_2 - \mu_1$  = difference in treatment response between two groups

$s$  = standard deviation (of mean treatment response)

$\alpha$  = type I error (risk of a false-positive result)

$\beta$  = type II error (risk of a false-negative result)

$1 - \beta$  = "power" to detect a difference of magnitude  $\mu_2 - \mu_1$

$f(\alpha, \beta)$  = function of  $\alpha, \beta$ . May be calculated but is most conveniently obtained from statistical tables.

## "Population values of lung volumes and flows in children: effect of sex, body mass and respiratory conditions"

R. Pistelli, G. Brancato, F. Forastiere, P. Michelozzi, G.M. Corbo, N. Agabiti, G. Ciappi, C.A. Perucci. – Population values of lung volumes and flows in children: effect of sex, body mass and respiratory conditions. *Eur Respir J*, 1992, 5: 463–470.

Table 6 has been reprinted to correct the mistype in column four. The correct figure is 1.811.

Table 6. – Sex-specific regression coefficients in models predicting  $\ln(\text{FVC})$  and  $\ln(\text{FEV}_1)$  in normal and overweight subjects, Latium, Italy, 1987

|                                       | Males           |                     |           | Females         |                     |           |
|---------------------------------------|-----------------|---------------------|-----------|-----------------|---------------------|-----------|
|                                       | Normal<br>n=991 | Overweight<br>n=112 | p-value** | Normal<br>n=954 | Overweight<br>n=105 | p-value** |
| <b><math>\ln(\text{FVC})</math></b>   |                 |                     |           |                 |                     |           |
| $\ln(\text{height})$                  | 1.996           | 1.554               | 0.022     | 1.811           | 2.264               | 0.026     |
| $\ln(\text{BMI})$                     | 0.211           | 0.143*              | 0.268     | 0.218           | 0.074*              | 0.136     |
| $\ln(\text{age})$                     | 0.108           | 0.285               | 0.061     | 0.227           | 0.123*              | 0.195     |
| Intercept                             | -0.987          | 0.393               |           | -0.360          | -3.260              |           |
| <b><math>\ln(\text{FEV}_1)</math></b> |                 |                     |           |                 |                     |           |
| $\ln(\text{height})$                  | 1.710           | 1.412               | 0.076     | 1.888           | 2.204               | 0.095     |
| $\ln(\text{BMI})$                     | 0.176           | 0.143*              | 0.375     | 0.172           | 0.030*              | 0.135     |
| $\ln(\text{age})$                     | 0.175           | 0.332               | 0.072     | 0.176           | 0.268               | 0.367     |
| Intercept                             | -0.042          | 0.904               |           | -0.989          | -3.644              |           |

\*: nonsignificant contribution to the model ( $p > 0.05$ ); \*\*: Z-test for differences of regression coefficients (overweight vs normal subjects). For abbreviations see legend to table 3.
